# Supplementary material
Source: publisher figshare collection journal article supplement (https://tandf.figshare.com/ndownloader/files/14747627)
Supplement: Supplementary file 1 [file 14747627]

# Supporting Information

## Limitations of the Toxicity Characteristic Leaching Procedure for Providing a Conservative Estimate of Landfilled Municipal Solid Waste Incineration Ash Leaching

*Vicharana Intrakamhaeng, Kyle A. Clavier, Justin G. Roessler, and Timothy G.  
Townsend\**

\* Corresponding author

Present address: 333 New Engineering Building Department of Environmental  
Engineering Sciences, University of Florida, Box 116450 Gainesville, FL 32611 – 6450,  
USA .

Ph. 352-392-0846; fax: 352-392-3076; Email: [ttown@ufl.edu](mailto:ttown@ufl.edu)

Number of Pages-10

Number of Figure-16

Number of Table-1



**Table S1** MSWI ashes Total Concentrations Data

| Elements | Total Concentration (Average $\pm$ Standard Deviation) |                     |                         |                         |
|----------|--------------------------------------------------------|---------------------|-------------------------|-------------------------|
|          | MSWI ashes (mg/kg)                                     |                     |                         |                         |
|          | BA_GT                                                  | BA_LT               | Combined ash            | Fly ash                 |
| Ag       | 190.7 $\pm$ 70.17                                      | 5.760 $\pm$ 1.836   | 0.7580 $\pm$<br>0.6292  | 14.87 $\pm$ 0.7730      |
| Al       | 37,580 $\pm$ 9,816                                     | 45,900 $\pm$ 13,600 | 17,800 $\pm$ 2,022      | 20,700 $\pm$ 1,104      |
| As       | 10.37 $\pm$ 1.420                                      | 14.84 $\pm$ 2.375   | 49.58 $\pm$ 19.30       | 79.03 $\pm$ 5.104       |
| Ba       | 319.3 $\pm$ 33.30                                      | 353.3 $\pm$ 12.70   | 339.5 $\pm$ 91.28       | 497.8 $\pm$ 20.61       |
| Ca       | 79,700 $\pm$ 6,467                                     | 97,700 $\pm$ 1,879  | 100,000 $\pm$<br>11,800 | 235,000 $\pm$<br>15,700 |
| Cd       | 13.81 $\pm$ 6.650                                      | 50.29 $\pm$ 2.760   | 36.38 $\pm$ 6.146       | 112.4 $\pm$ 4.815       |
| Cr       | 60.88 $\pm$ 16.30                                      | 97.70 $\pm$ 13.70   | 102.2 $\pm$ 46.36       | 72.23 $\pm$ 4.505       |
| Cu       | 3,200 $\pm$ 2,000                                      | 2,884 $\pm$ 1,829   | 888.2 $\pm$ 377.1       | 619.1 $\pm$ 20.31       |
| Fe       | 32,100 $\pm$<br>17,800                                 | 34,200 $\pm$ 4,425  | 55,200 $\pm$<br>36,100  | 6,473 $\pm$ 420.6       |
| K        | 2,400 $\pm$ 242.2                                      | 4,500 $\pm$ 298.6   | 4,317 $\pm$ 238.5       | 24,500 $\pm$ 1,806      |
| Mg       | 4,694 $\pm$ 303.6                                      | 6,183 $\pm$ 629.5   | 5,257 $\pm$ 812.9       | 8,991 $\pm$ 584.1       |
| Mn       | 496.00 $\pm$ 93.40                                     | 1,294 $\pm$ 60.26   | 562.0 $\pm$ 546.9       | 818.6 $\pm$ 41.69       |
| Mo       | 11.95 $\pm$ 3.145                                      | 11.60 $\pm$ 1.906   | 7.990 $\pm$ 2.402       | 10.63 $\pm$ 0.3443      |
| Na       | 7,813 $\pm$ 742.3                                      | 10,300 $\pm$ 430.4  | 12,700 $\pm$ 5,170      | 31,800 $\pm$ 2,251      |
| Ni       | 107.9 $\pm$ 78.85                                      | 170.6 $\pm$ 45.08   | 49.60 $\pm$ 43.26       | 42.00 $\pm$ 0.2307      |
| Pb       | 673.4 $\pm$ 221.7                                      | 1,573 $\pm$ 1,173   | 678.0 $\pm$ 468.8       | 2,576 $\pm$ 106.7       |
| Sb       | 24.60 $\pm$ 9.955                                      | 57.32 $\pm$ 3.900   | 57.89 $\pm$ 16.33       | 483.8 $\pm$ 47.11       |
| Se       | 0.6000 $\pm$<br>0.0000                                 | $\leq$ 0.4200       | $\leq$ 0.4200           | $\leq$ 0.4200           |
| Sn       | 107.0 $\pm$ 39.58                                      | 75.11 $\pm$ 44.03   | 90.88 $\pm$ 14.47       | 156.7 $\pm$ 3.107       |
| Sr       | 188.3 $\pm$ 24.36                                      | 208.21 $\pm$ 28.53  | 235.0 $\pm$ 83.10       | 292.3 $\pm$ 11.76       |
| Ti       | 1,067 $\pm$ 102.8                                      | 1,024 $\pm$ 287.1   | 697.0 $\pm$ 77.8        | 610.4 $\pm$ 55.14       |
| V        | 13.35 $\pm$ 1.426                                      | 17.38 $\pm$ 0.4045  | 14.57 $\pm$ 3.892       | 16.30 $\pm$ 1.005       |
| Zn       | 2,665 $\pm$ 1,010                                      | 5,510 $\pm$ 377.9   | 5,440 $\pm$ 851.8       | 8,482 $\pm$ 184.4       |

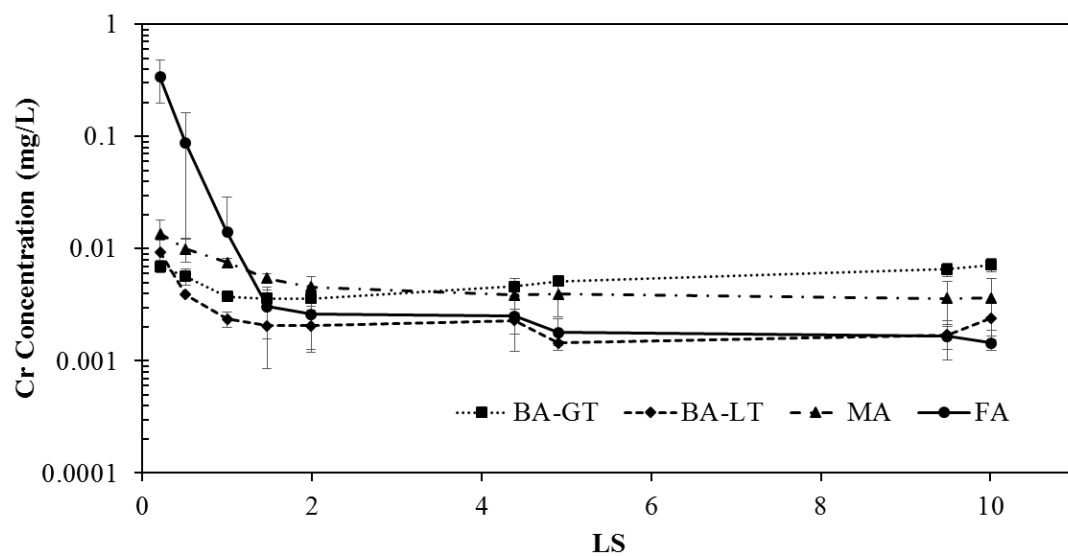

**Figure S1.** Chromium concentrations from four MSWI ash samples measured during 1314 leach testing. Results at each target LS represent the average of two column tests.

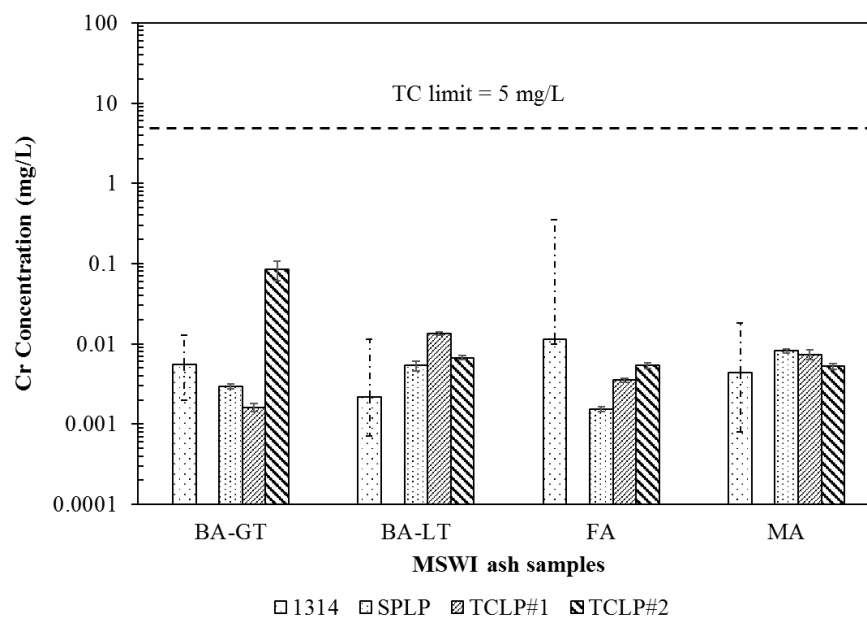

**Figure S2.** Comparison of Cr concentrations from different extraction solutions in four MSWI ash samples. For SPLP and TCLP, the average of triplicate measurements are presented along with standard deviation as the error bars. For 1314, the weighted average concentration is presented, while the error bars represent the minimum and maximum concentration measured.

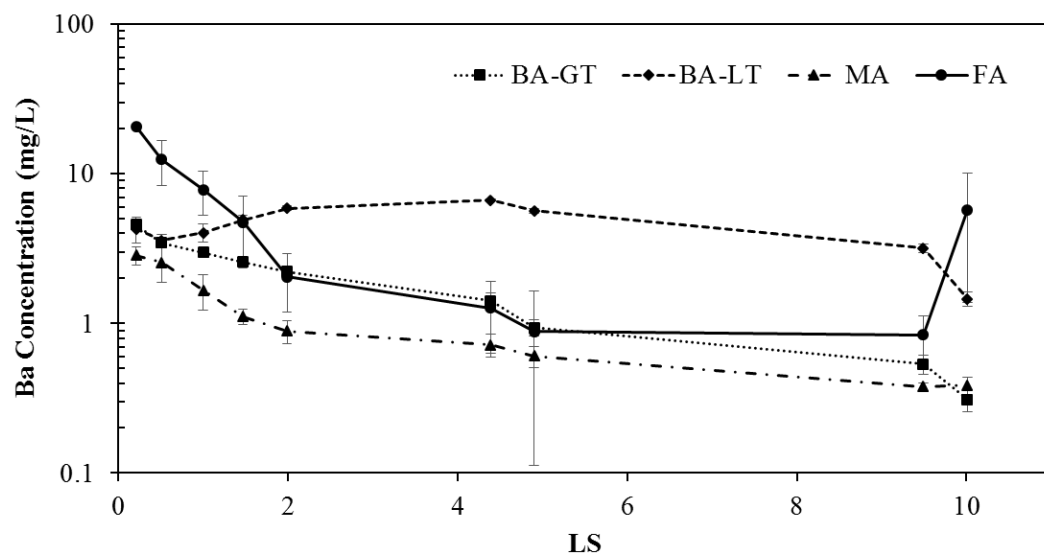

**Figure S3.** Barium concentrations from four MSWI ash samples measured during 1314 leach testing. Results at each target LS represent the average of two column tests.

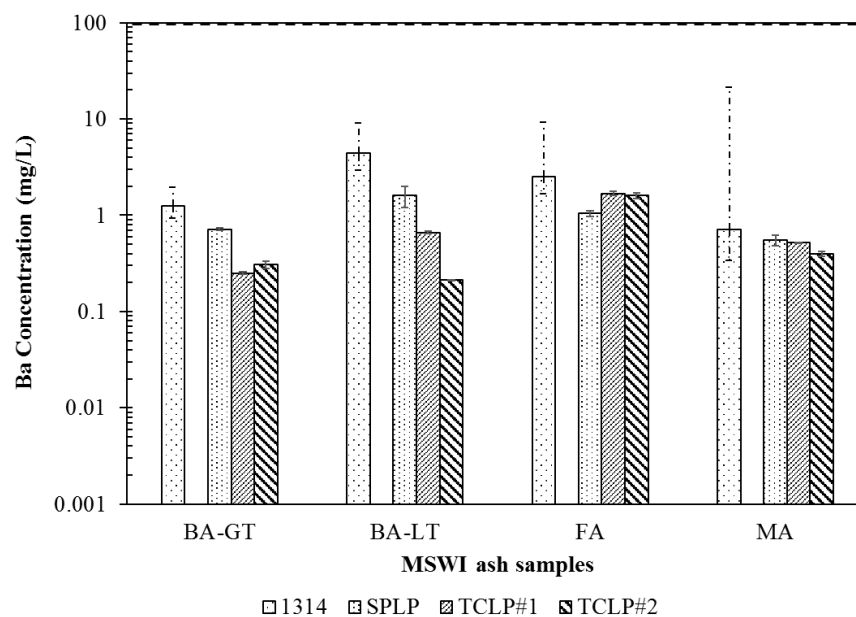

**Figure S4.** Comparison of Ba concentrations from different extraction solutions in four MSWI ash samples. For SPLP and TCLP, the average of triplicate measurements are presented along with standard deviation as the error bars. For 1314, the weighted average concentration is presented, while the error bars represent the minimum and maximum concentration measured.

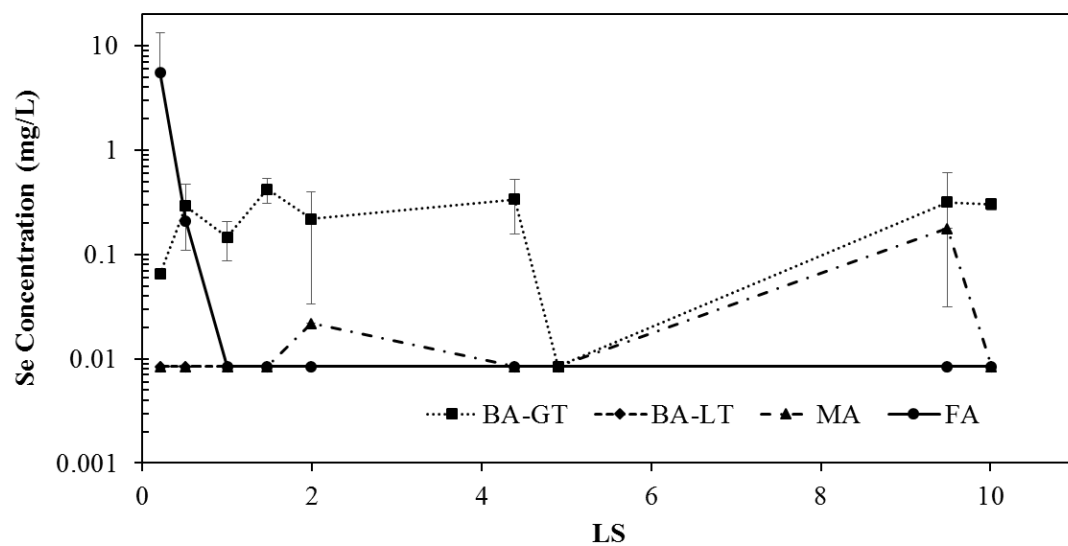

**Figure S5.** Selenium concentrations from four MSWI ash samples measured during 1314 leach testing. Results at each target LS represent the average of two column tests.



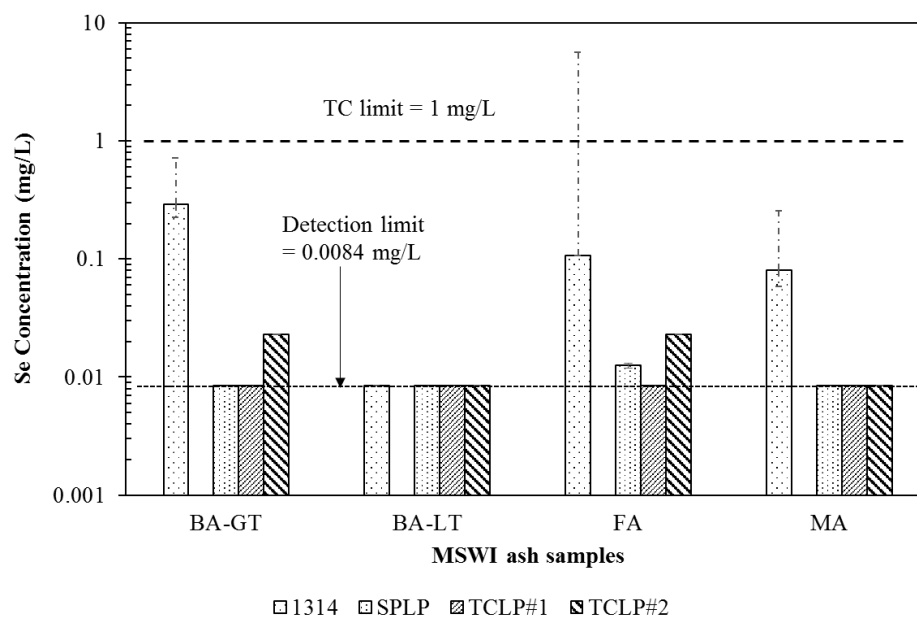

**Figure S6.** Comparison of Se concentrations from different extraction solutions in four MSWI ash samples. For SPLP and TCLP, the average of triplicate measurements are presented along with standard deviation as the error bars. For 1314, the weighted average concentration is presented, while the error bars represent the minimum and maximum concentration measured.

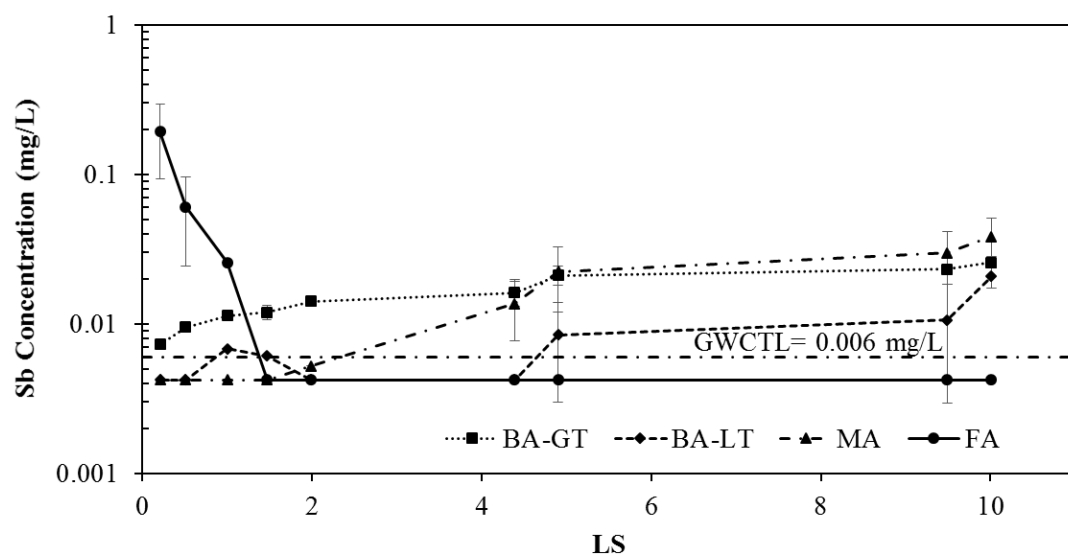

**Figure S7.** Antimony concentrations from four MSWI ash samples measured during 1314 leach testing. Results at each target LS represent the average of two column tests.

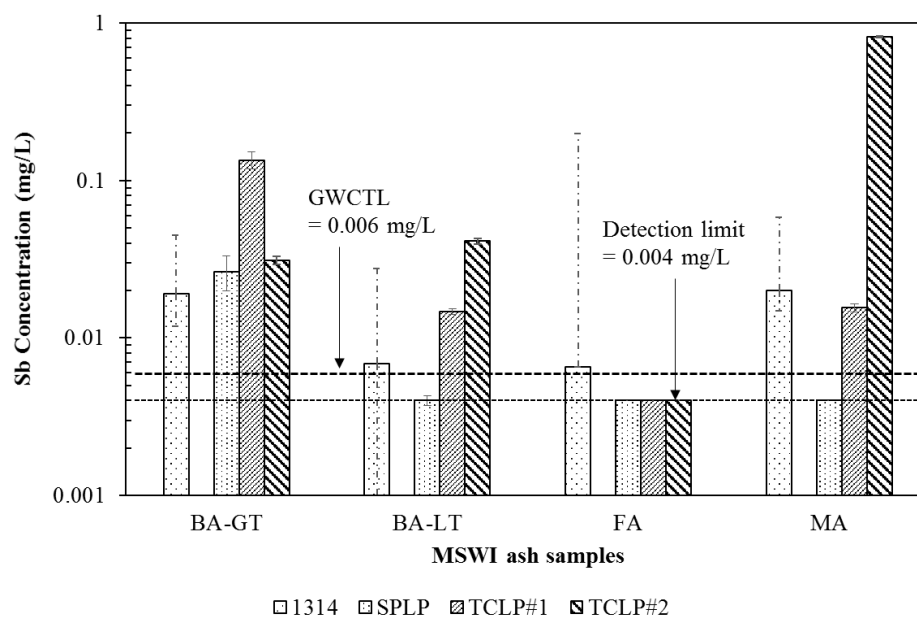

**Figure S8.** Comparison of Sb concentrations from different extraction solutions in four MSWI ash samples. For SPLP and TCLP, the average of triplicate measurements are presented along with standard deviation as the error bars. For 1314, the weighted average concentration is presented, while the error bars represent the minimum and maximum concentration measured.

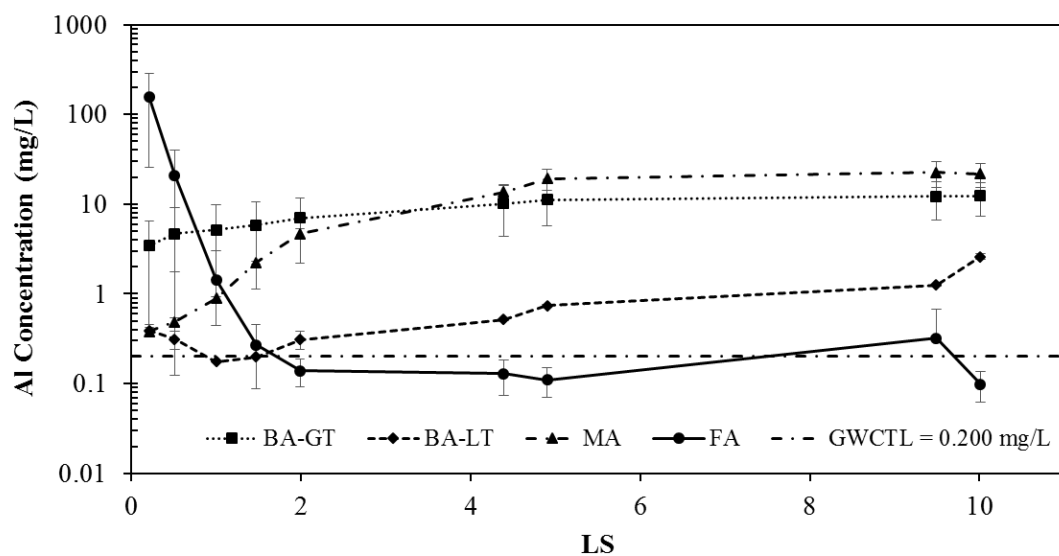

**Figure S9.** Aluminum concentrations from four MSWI ash samples measured during 1314 leach testing. Results at each target LS represent the average of two column tests.

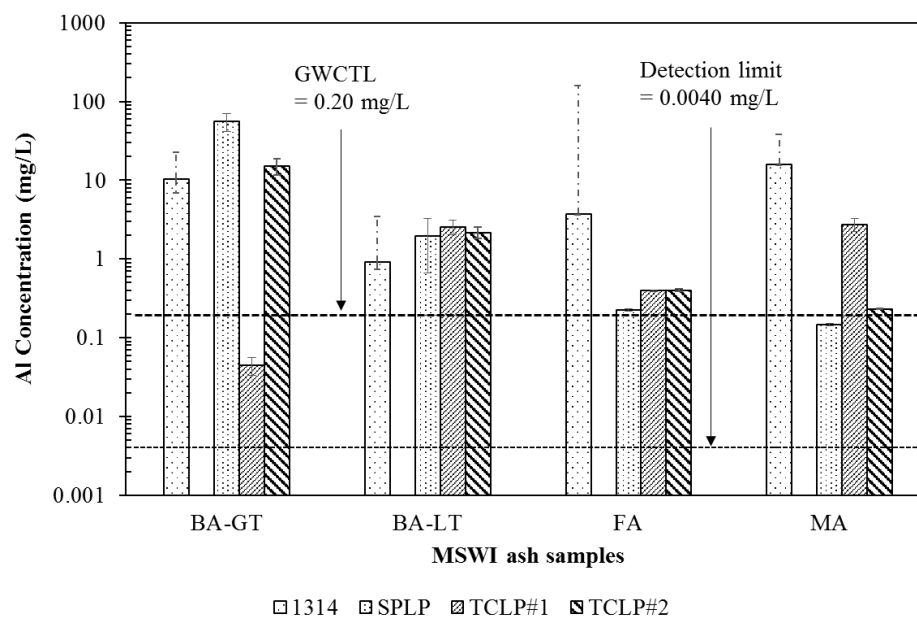

**Figure S10.** Comparison of Al concentrations from different extraction solutions in four MSWI ash samples. For SPLP and TCLP, the average of triplicate measurements are presented along with standard deviation as the error bars. For 1314, the weighted average concentration is presented, while the error bars represent the minimum and maximum concentration measured.

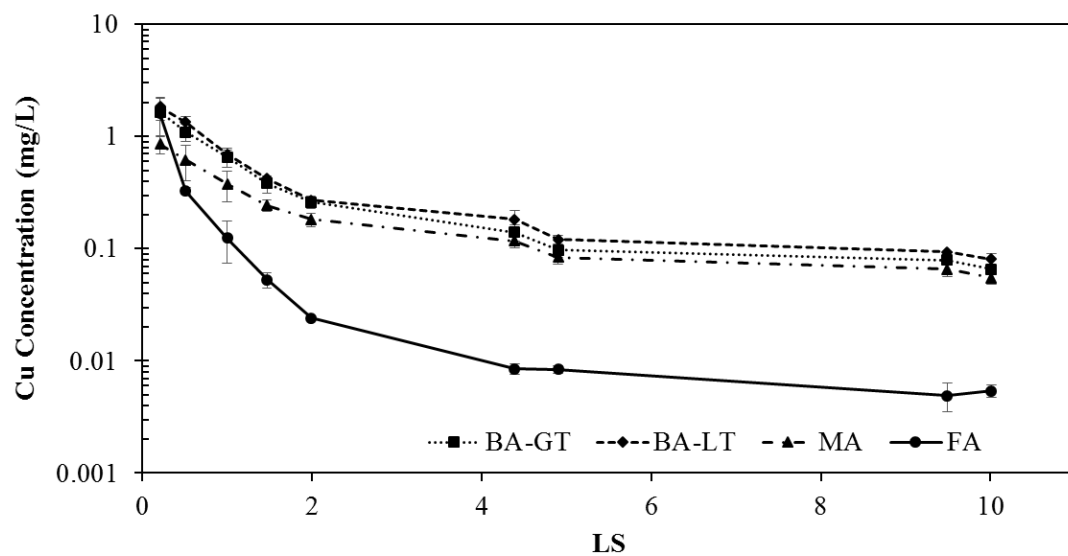

**Figure S11.** Copper concentrations from four MSWI ash samples measured during 1314 leach testing. Results at each target LS represent the average of two column tests.

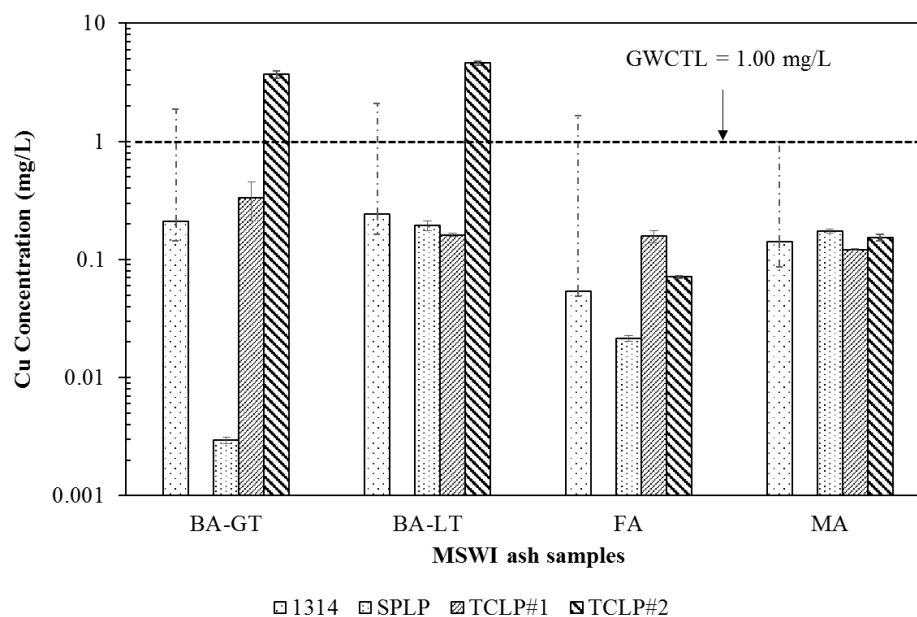

**Figure S12.** Comparison of Cu concentrations from different extraction solutions in four MSWI ash samples. For SPLP and TCLP, the average of triplicate measurements are presented along with standard deviation as the error bars. For 1314, the weighted average concentration is presented, while the error bars represent the minimum and maximum concentration measured.

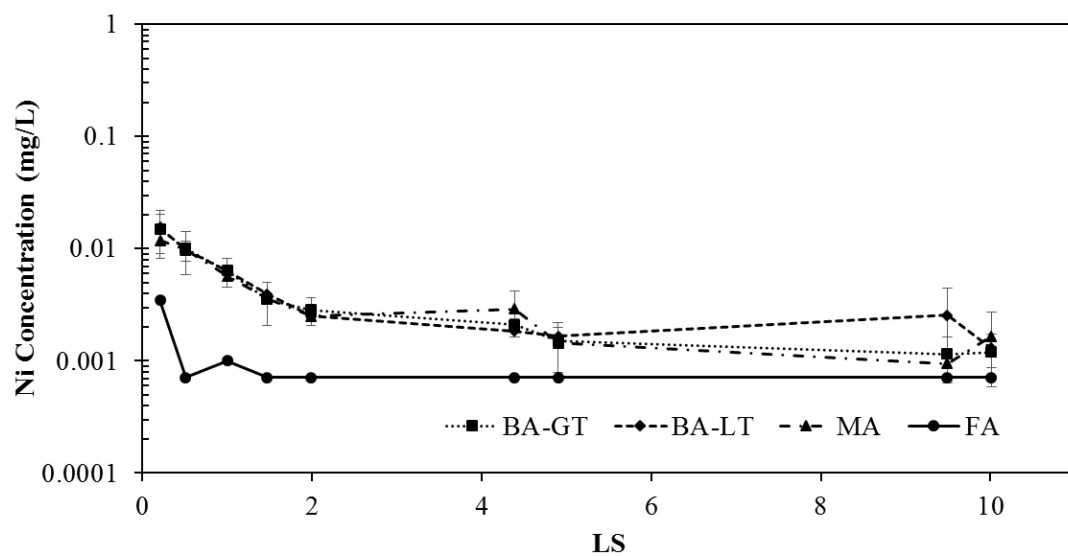

**Figure S13.** Nickel concentrations from four MSWI ash samples measured during 1314 leach testing. Results at each target LS represent the average of two column tests.



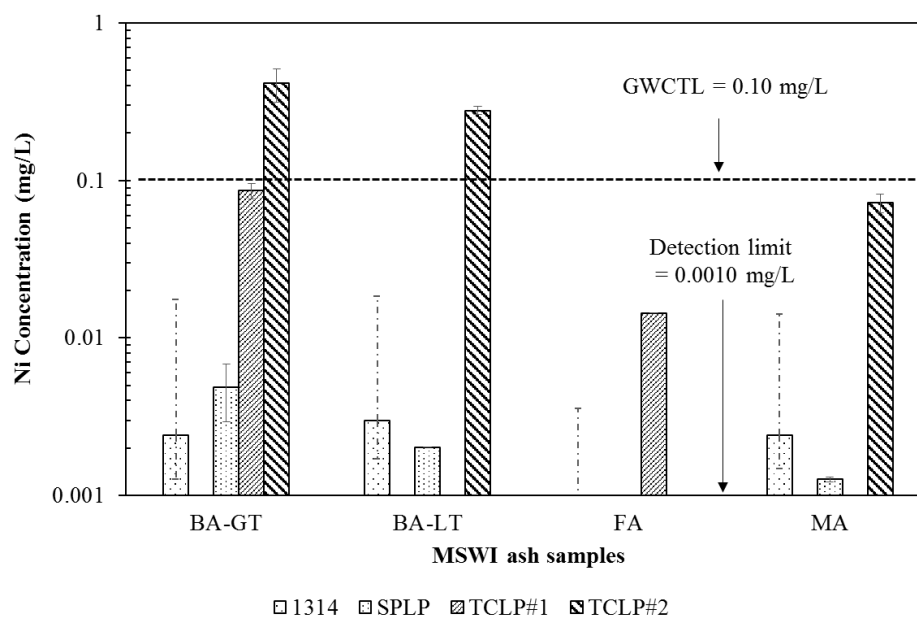

**Figure S14.** Comparison of Ni concentrations from different extraction solutions in four MSWI ash samples. For SPLP and TCLP, the average of triplicate measurements are presented along with standard deviation as the error bars. For 1314, the weighted average concentration is presented, while the error bars represent the minimum and maximum concentration measured.

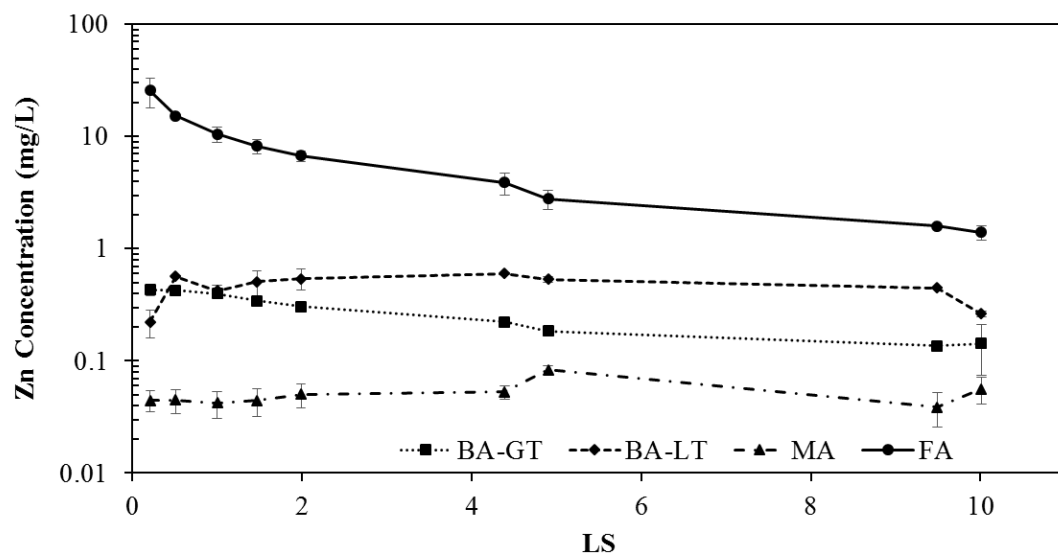

**Figure S15.** Zinc concentrations from four MSWI ash samples measured during 1314 leach testing. Results at each target LS represent the average of two column tests.

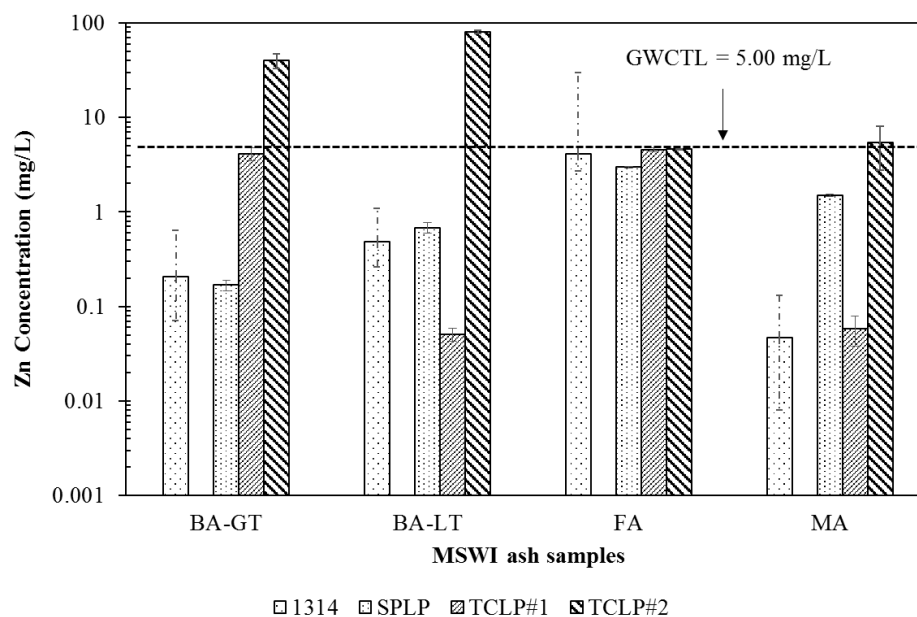

**Figure S16.** Comparison of Zn concentrations from different extraction solutions in four MSWI ash samples. For SPLP and TCLP, the average of triplicate measurements are presented along with standard deviation as the error bars. For 1314, the weighted average concentration is presented, while the error bars represent the minimum and maximum concentration measured.
